# Supplementary material for: Identification of globin switching-related genes and RNAs via transcriptomic profiling of nucleated red blood cells isolated from the cord blood of preterm and full-term newborns&nbsp;
Source: Research Square preprint supplement (doi:10.21203/rs.3.rs-45443/v2), 2020-12-10
Supplement: Supplementary file 1 [file a225c936fb691e53100a6552.xlsx]

## Sheet: Sheet1
miRNA	target ID	gene sybmle
hsa-let-7b-3p	NM_001276459	ELF2
hsa-let-7b-5p	NM_182973	TMPRSS9
hsa-let-7g-3p	NM_198925	SEMA4B
hsa-miR-135a-3p	NM_001190440	NCOR1
hsa-miR-135a-3p	NM_181552	CUX1
hsa-miR-143-3p	NM_207113	SLC37A3
hsa-miR-181c-5p	NM_020980	AQP9
hsa-miR-218-5p	NM_001257386	ABCG2
hsa-miR-218-5p	NM_170774	RASSF2
hsa-miR-3200-5p	NM_001287431	ARFIP1
hsa-miR-3200-5p	NM_148416	ATXN2L
hsa-miR-3529-3p	NM_018427	RRN3
hsa-miR-423-5p	NM_175842	SMOX
hsa-miR-548t-3p	NM_001286176	C2CD5
hsa-miR-548t-3p	NM_012399	PITPNB
hsa-miR-548t-3p	NM_170708	LMNA
hsa-miR-7851-3p	NM_001160	APAF1
hsa-miR-7851-3p	NM_021213	PCTP
novel_mir111	NM_130837	OPA1
novel_mir36	NM_031310	PLVAP
novel_mir36	NM_033111	N4BP2L2
novel_mir90	NM_001257231	ALG13
novel_mir90	NM_001297437	FBXO4
